# Supplementary material
Source: PubMed Central journal article supplement (PMC8261472)
Supplement: mmc2.pdf [file mmc2.pdf]

A

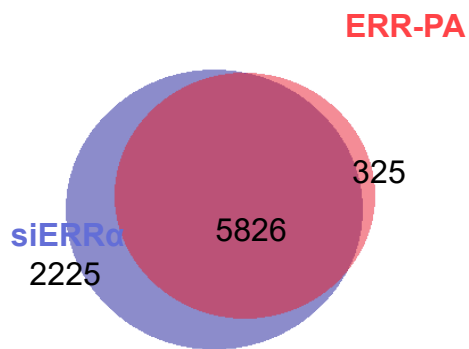

FDR .05, FC 1.2

Total 6,151 targeted genes by ERR-PA:

5,826/6,151= 94.7% (shared target genes with siERR $\alpha$ )

325/6,151= 5.3% (off-target genes)

B

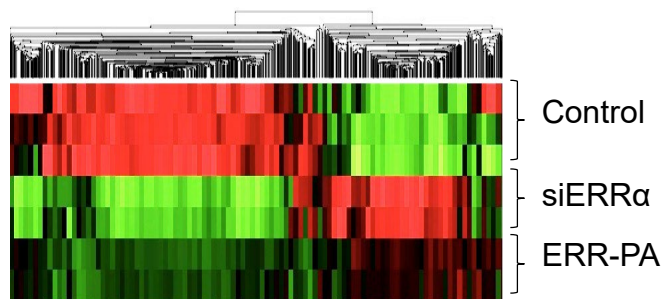

C

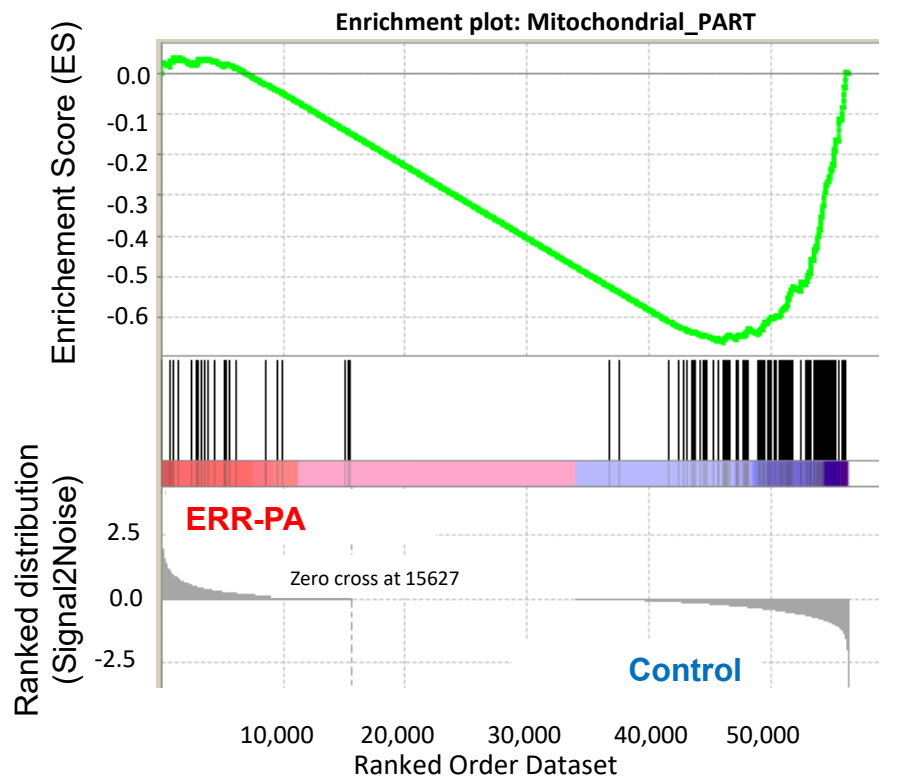

— Enrichment profile — Hits — Ranked metric scores
