# Supplementary material
Source: PubMed Central journal article supplement (PMC8261472)

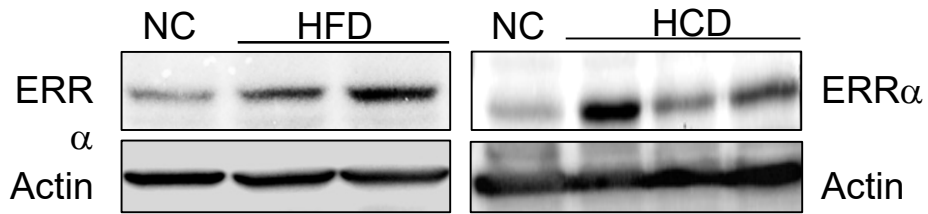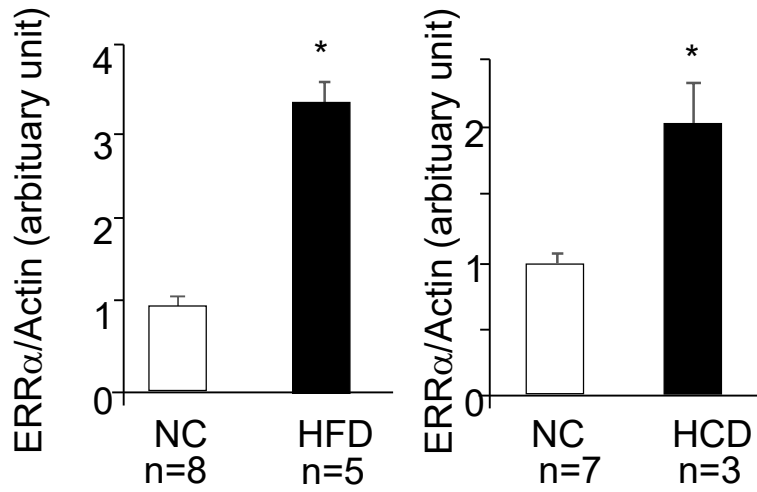

Supplement: mmc1.pdf [file mmc1.pdf]

A

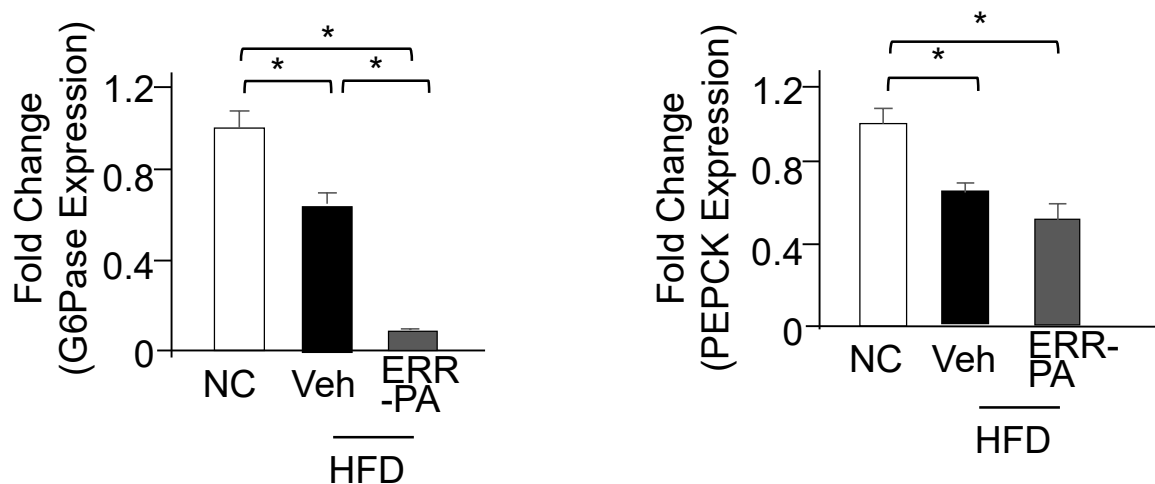

B

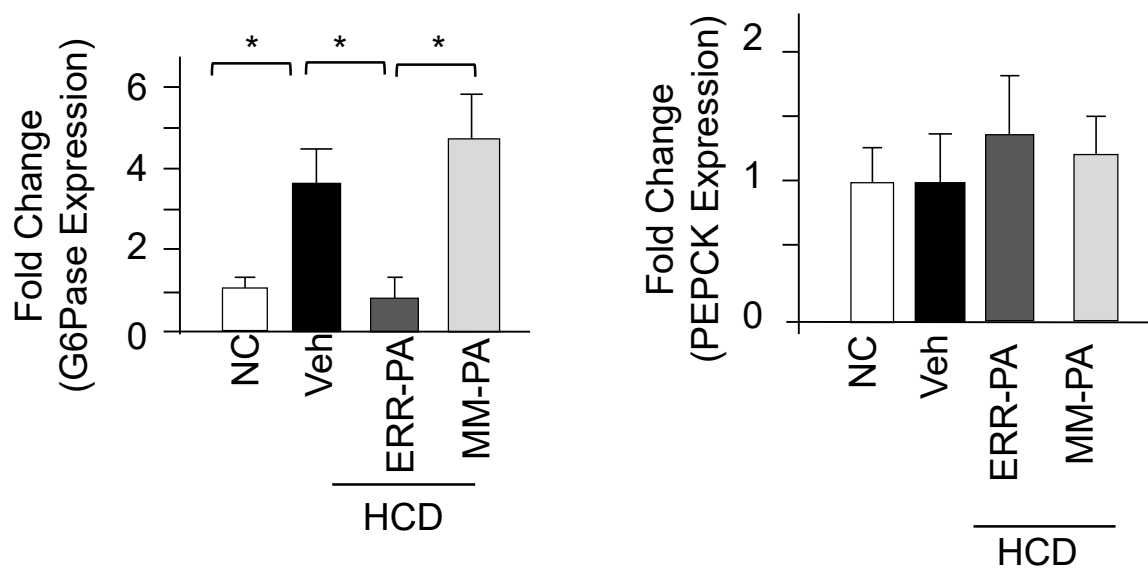

C

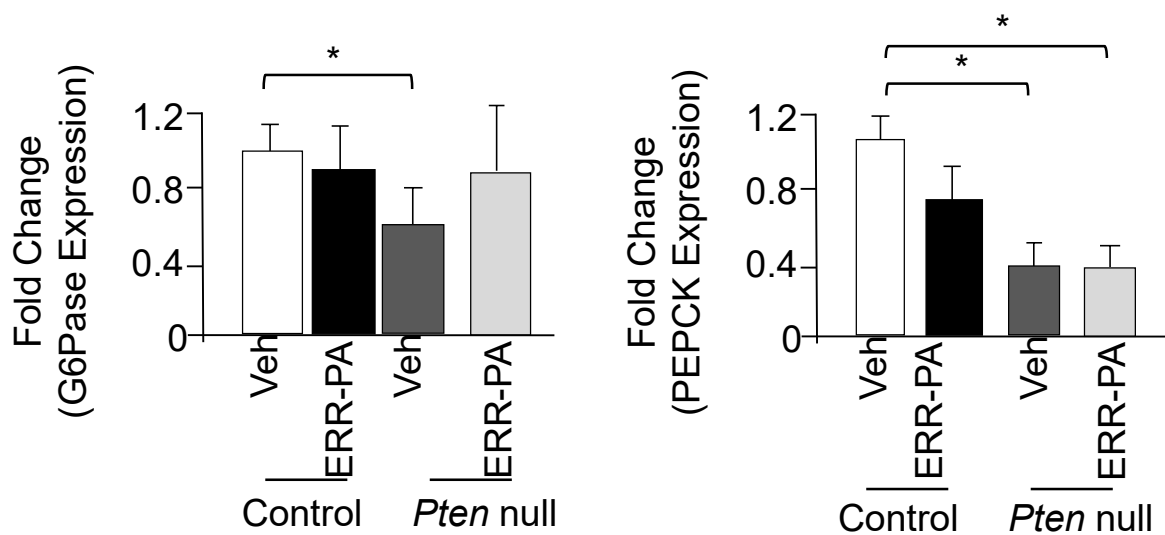

Supplement: mmc3.pdf [file mmc3.pdf]

A

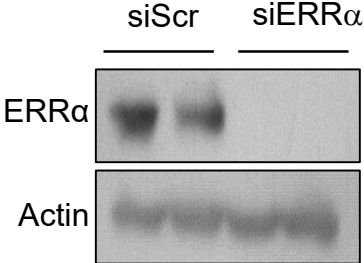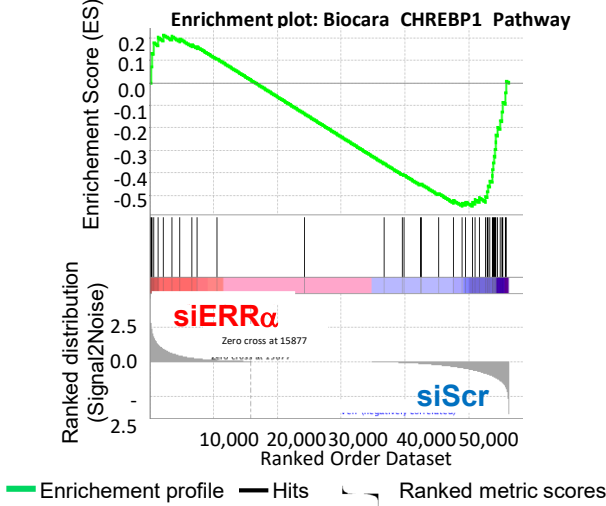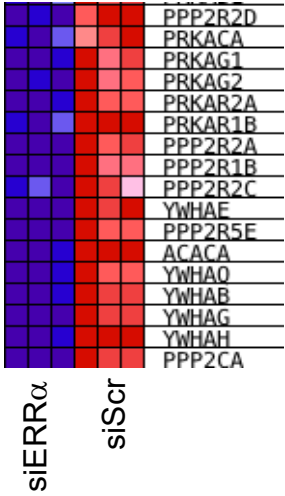

B

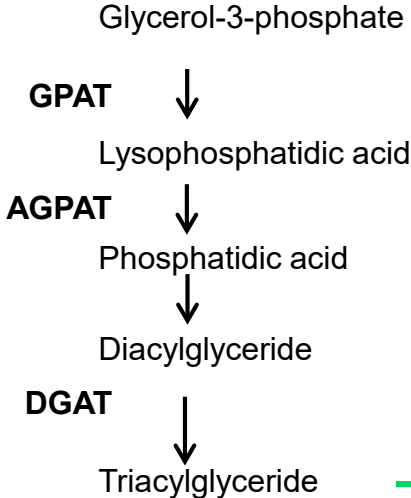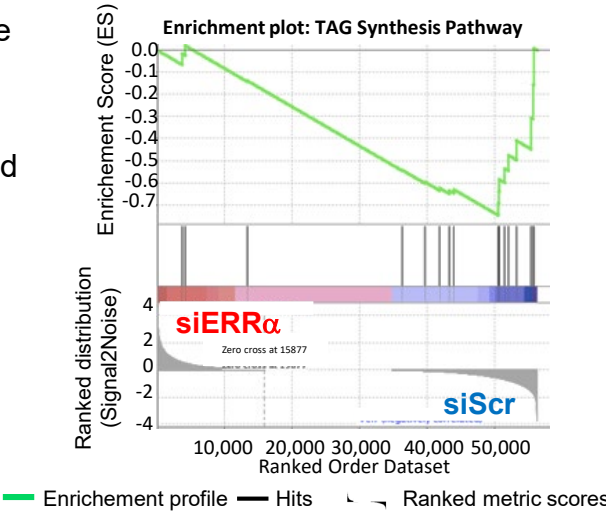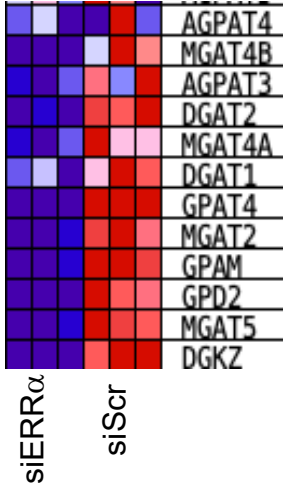

Supplement: mmc4.pdf [file mmc4.pdf]
